# Supplementary material for: Synthesis and complexation study of (1,4-linked)-homothiaisocalixnaphthalenes
Source: Royal Society of Chemistry journal article supplement (doi:10.1039/b702152f), 2007-01-01

## Supplementary Information

### SYNTHESIS AND COMPLEXATION STUDY OF (1,4-LINKED)-HOMOTHIAISOCA LIXNAPHTHALENES

#### Table of Contents

|                                                                                                                  |                              |
|------------------------------------------------------------------------------------------------------------------|------------------------------|
| <sup>1</sup> H and <sup>13</sup> C NMR spectra of compounds <b>16a-d</b> :                                       | Pages: <b>S2-S5</b>          |
| <sup>1</sup> H and <sup>13</sup> C NMR spectra of compounds <b>12a-b</b> and <b>12c-d</b> :                      | Pages: <b>S6-S7, S9, S11</b> |
| <sup>1</sup> H and <sup>13</sup> C NMR spectra of compounds <b>17b</b> and <b>17c</b> :                          | Pages: <b>S8 and S10</b>     |
| Chemical shift changes ( $\Delta\delta$ ) for protons on <b>12a</b> vs added AgO <sub>2</sub> CCF <sub>3</sub> : | Page <b>S12</b>              |
| Chemical shift changes ( $\Delta\delta$ ) for protons on <b>12b</b> vs added AgO <sub>2</sub> CCF <sub>3</sub> : | Page <b>S13</b>              |
| Chemical shift changes ( $\Delta\delta$ ) for protons on <b>12a</b> vs added HgCl <sub>2</sub> :                 | Page <b>S14</b>              |
| Chemical shift changes ( $\Delta\delta$ ) for protons on <b>12b</b> vs added HgCl <sub>2</sub> :                 | Page <b>S14</b>              |
| Non-linear Curve Fit Plots for <b>12a</b> and <b>12b</b> vs added AgO <sub>2</sub> CCF <sub>3</sub> :            | Page <b>S15</b>              |
| Non-linear Curve Fit Plots for <b>12a</b> and <b>12b</b> vs added HgCl <sub>2</sub> :                            | Page <b>S16</b>              |

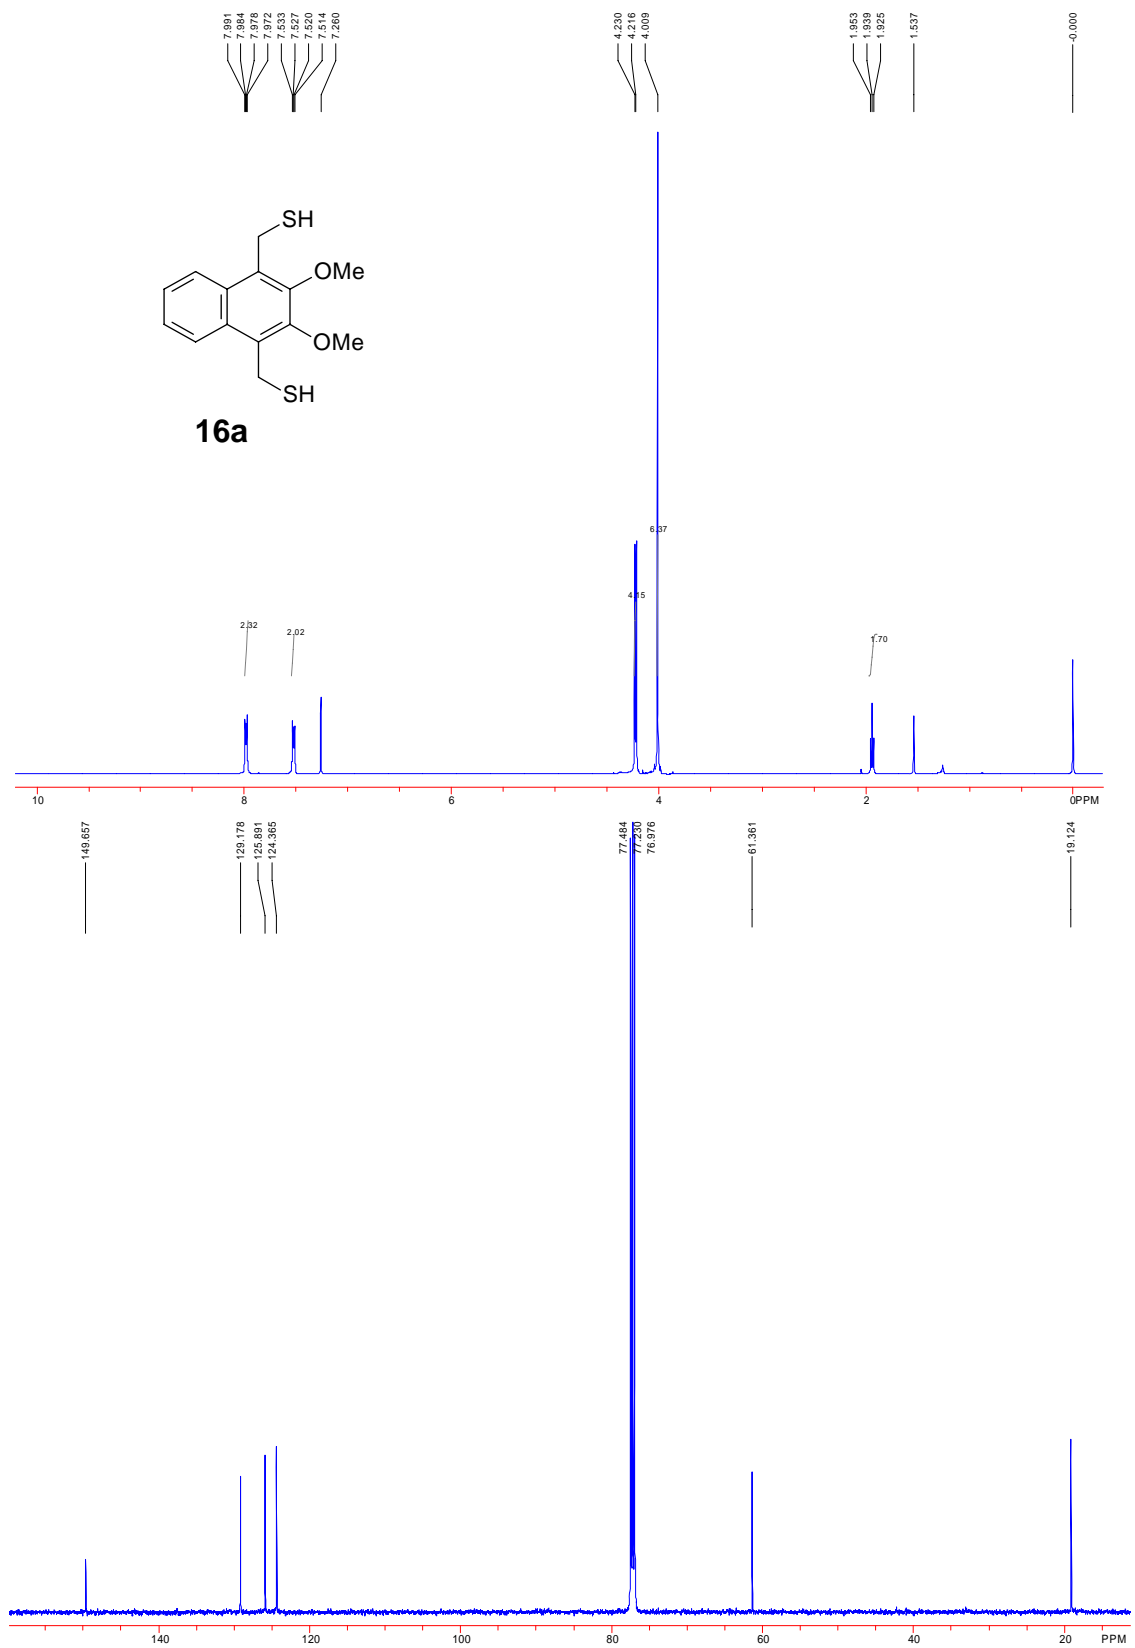

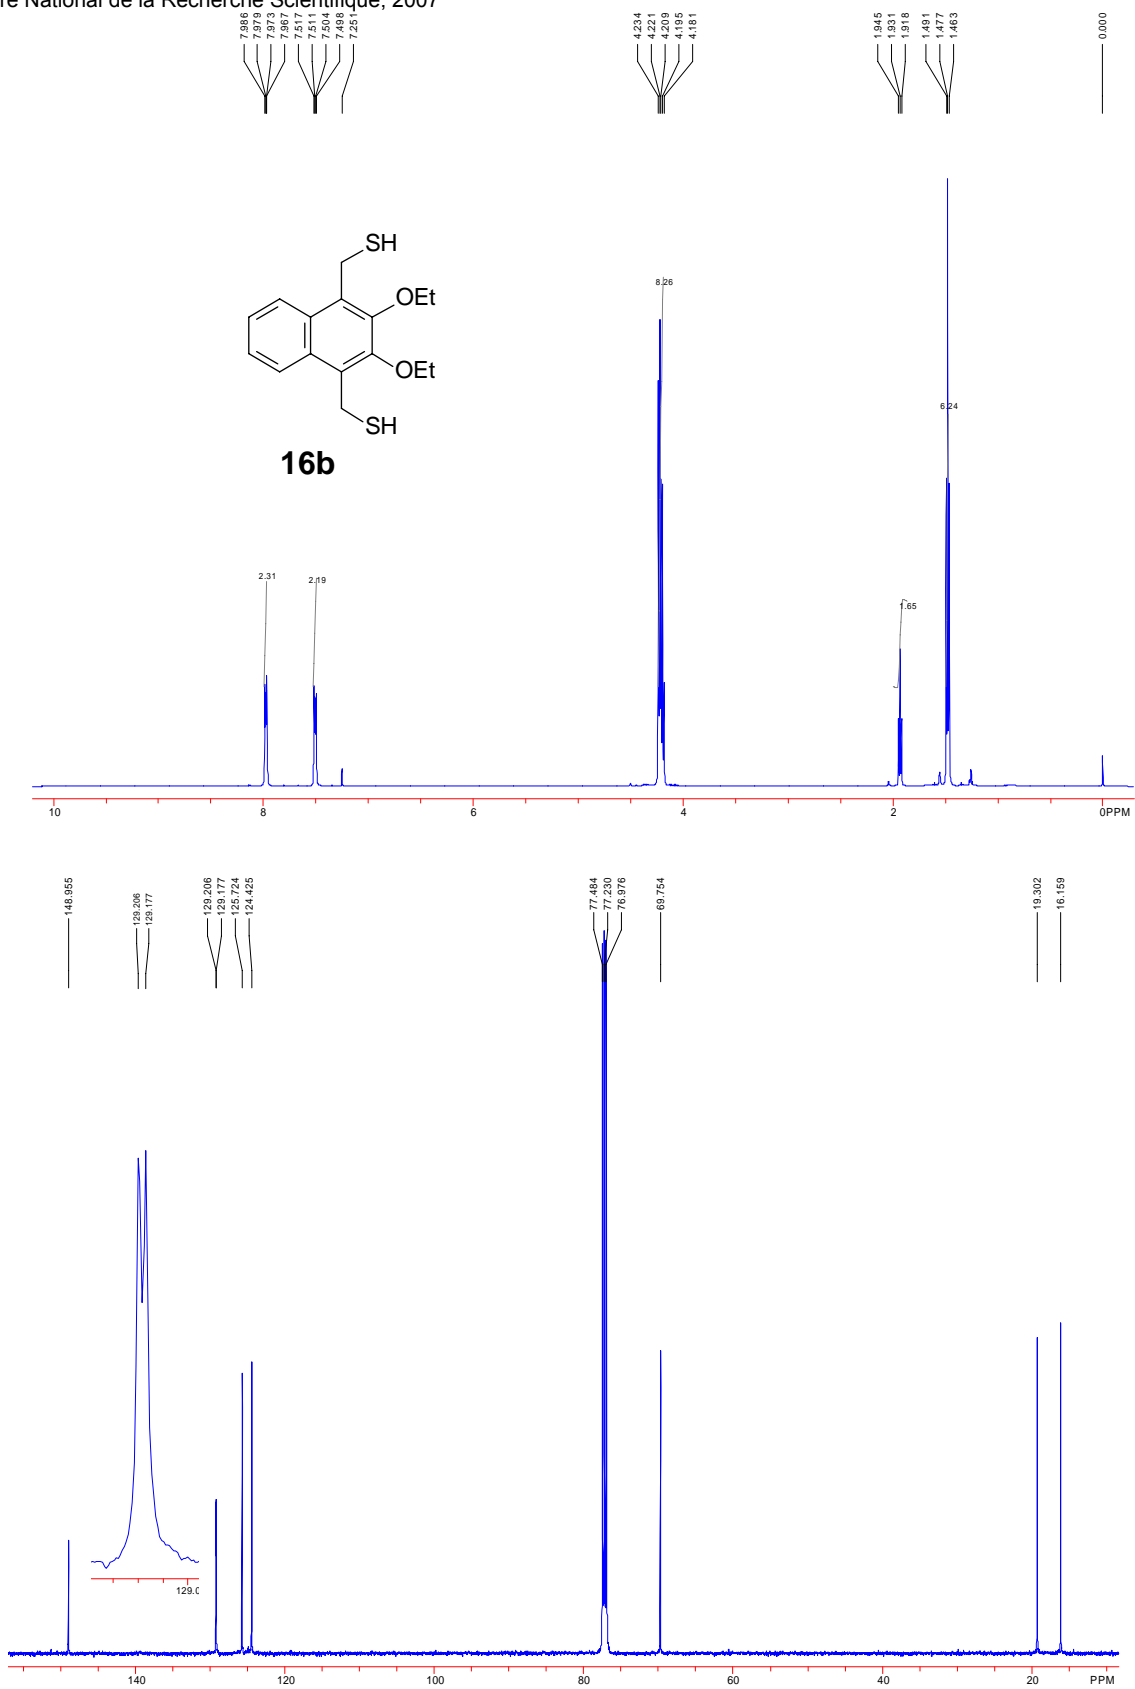

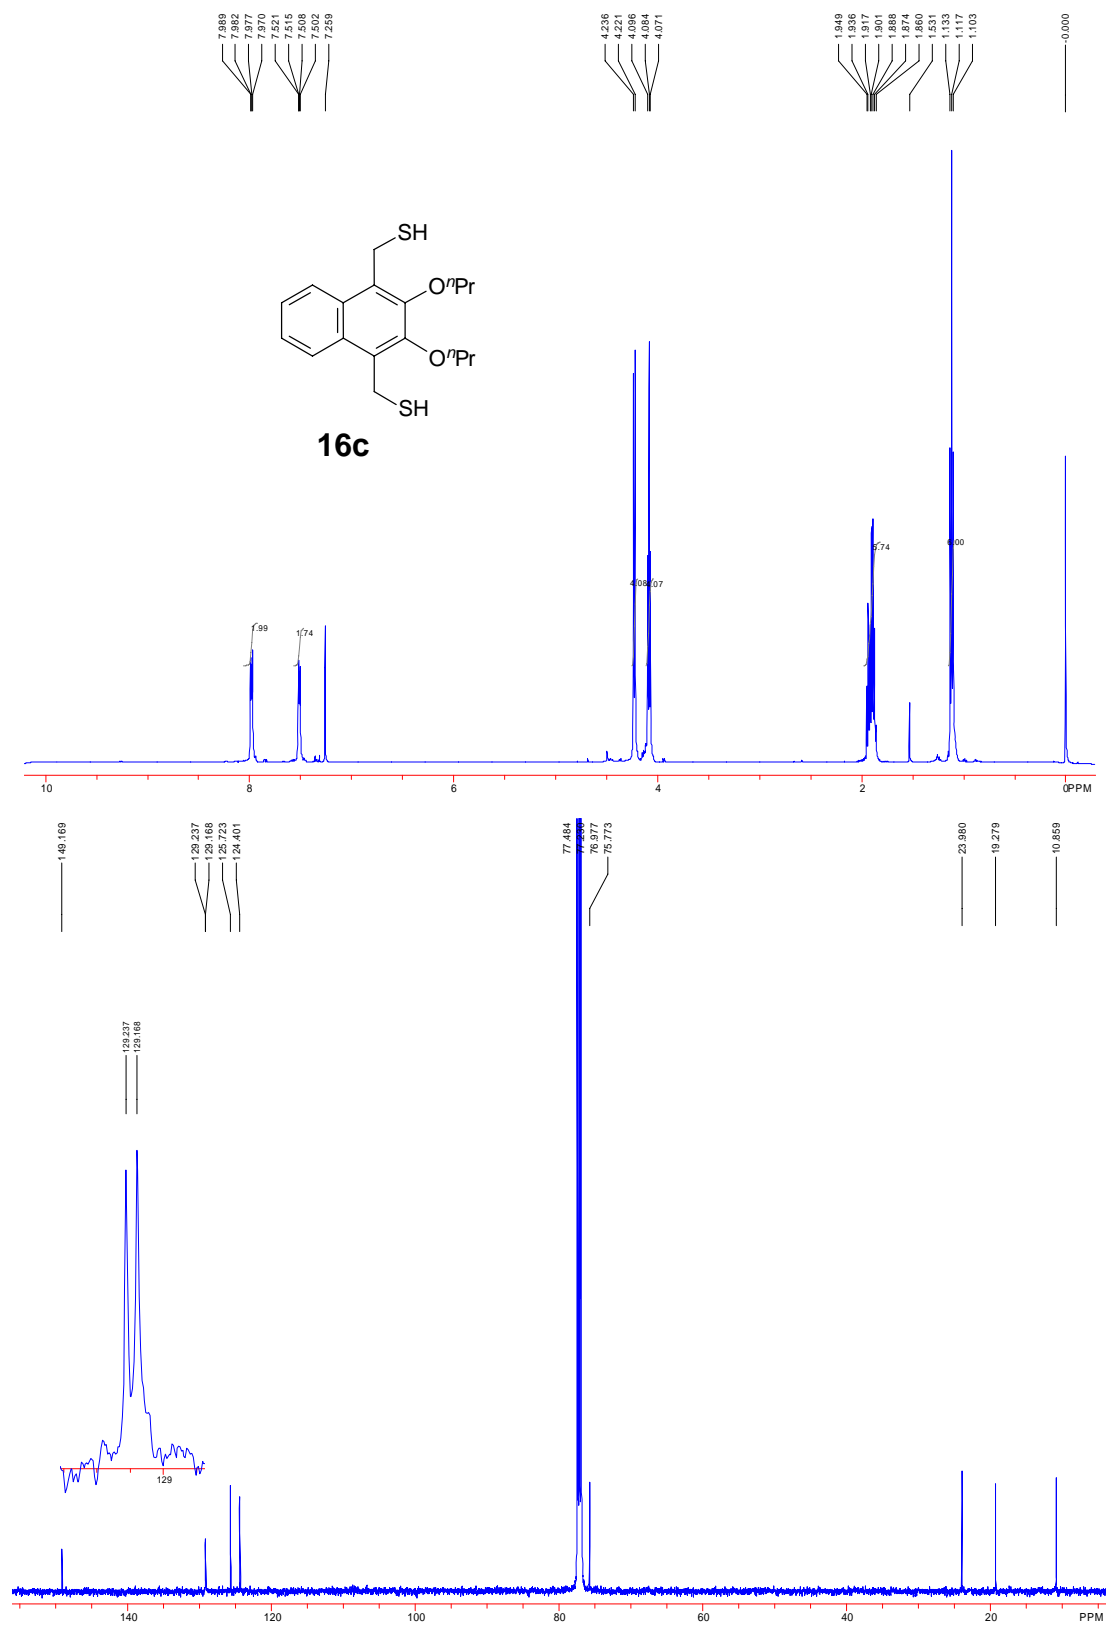

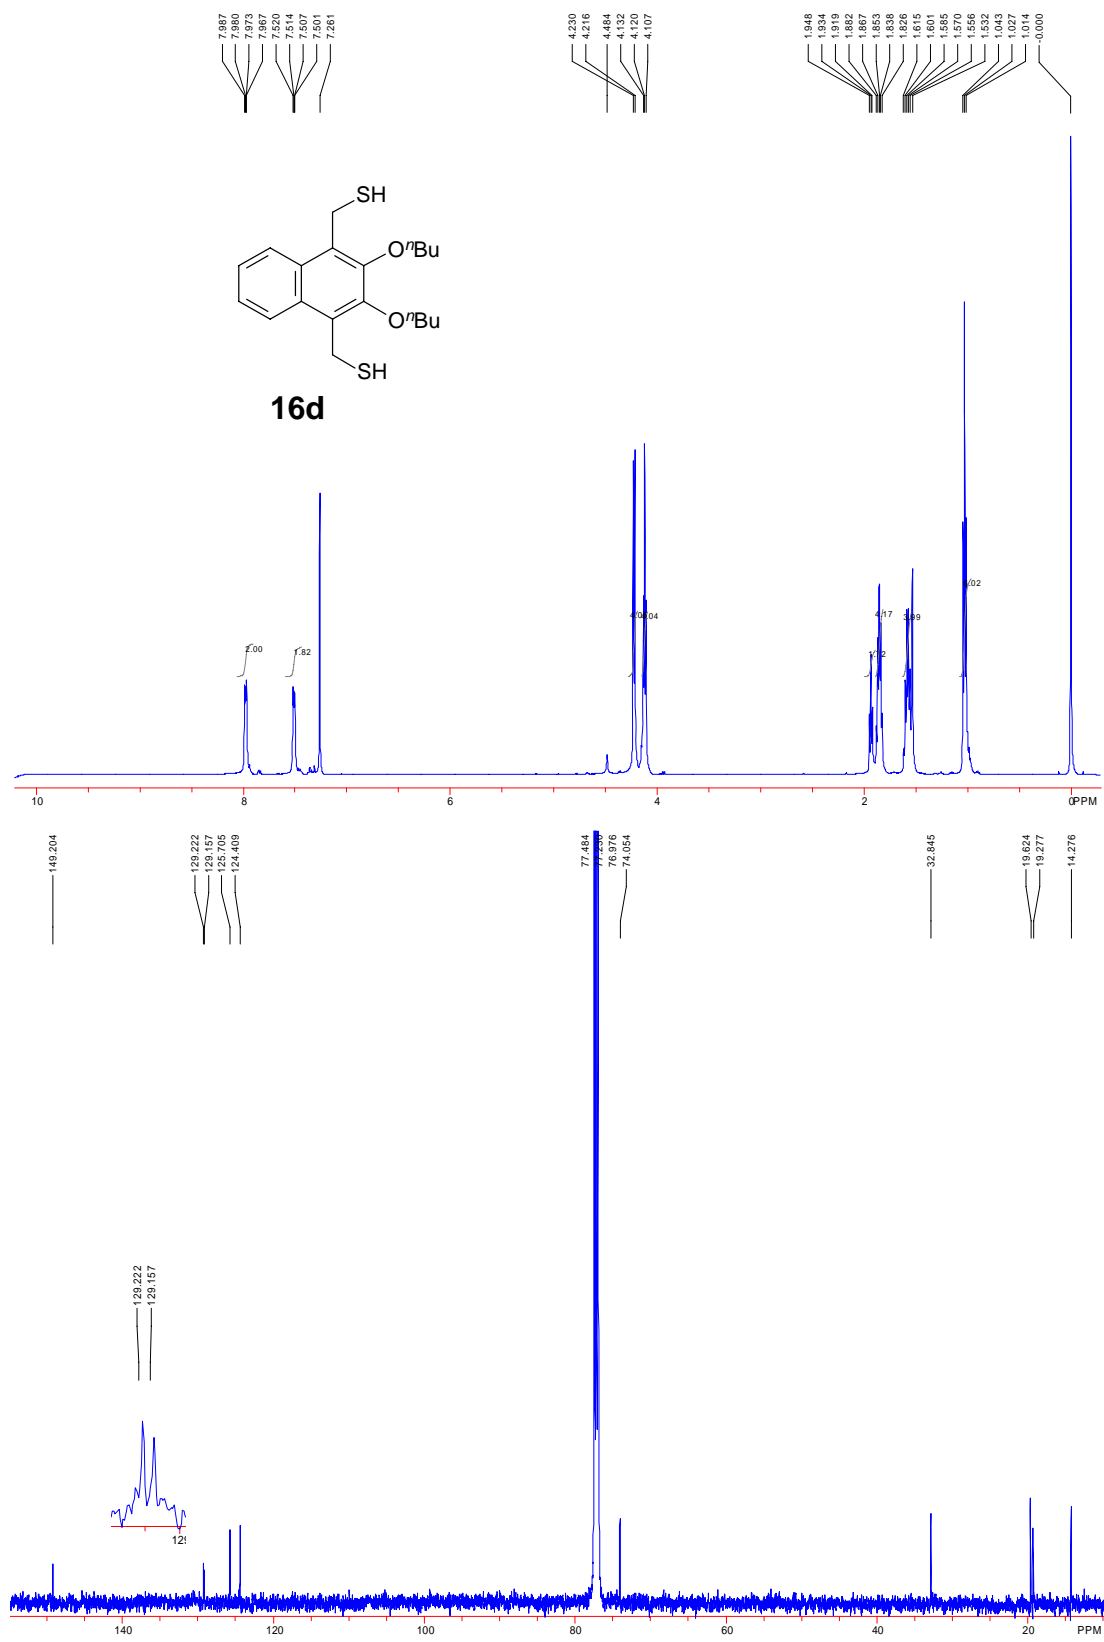

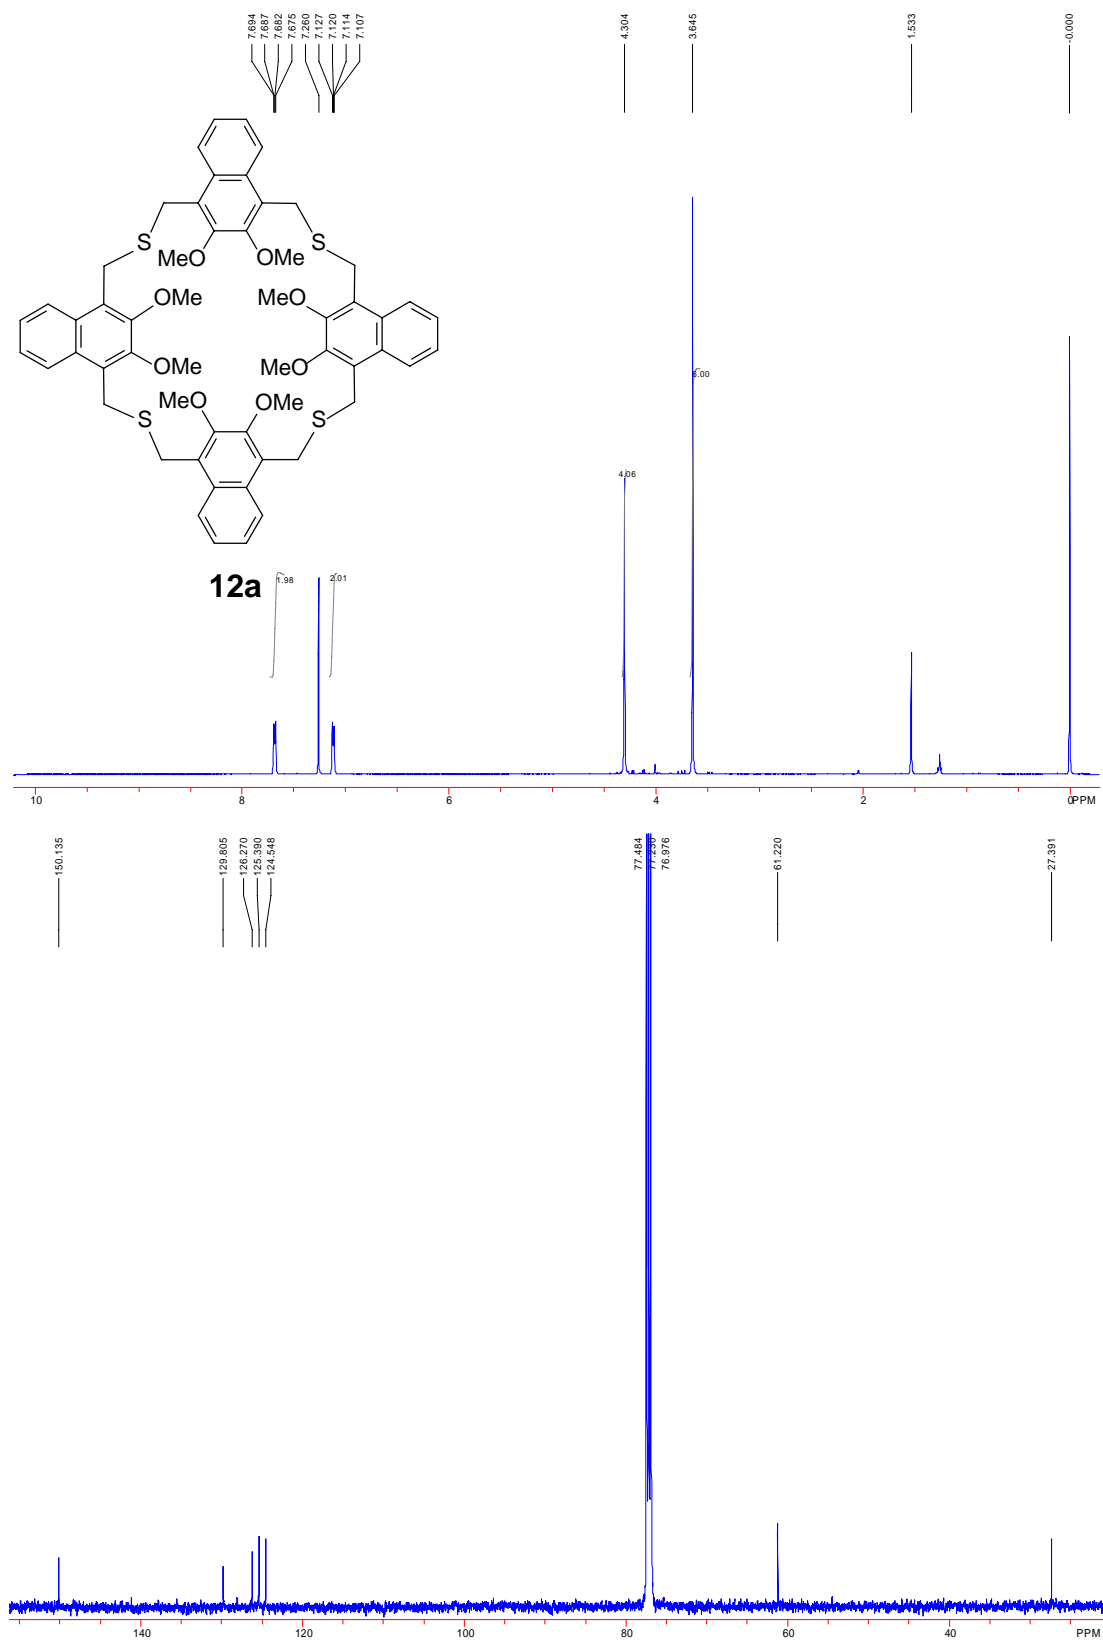

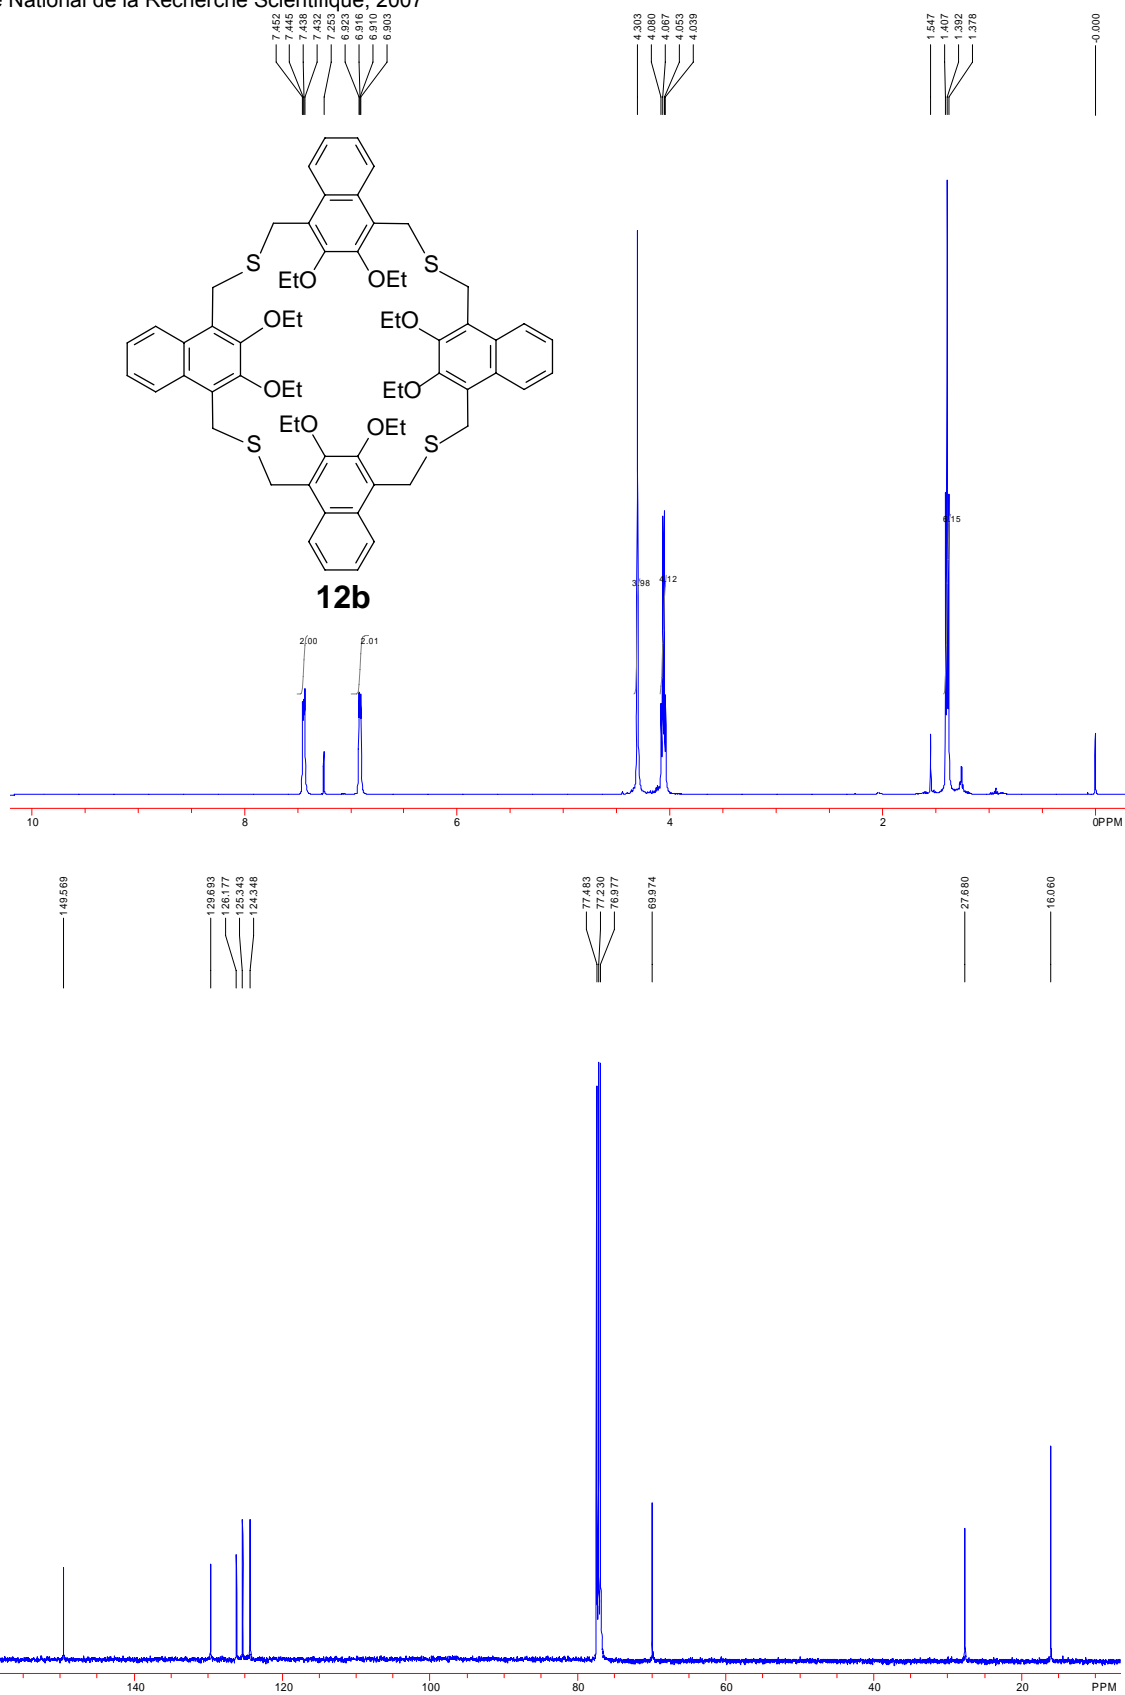

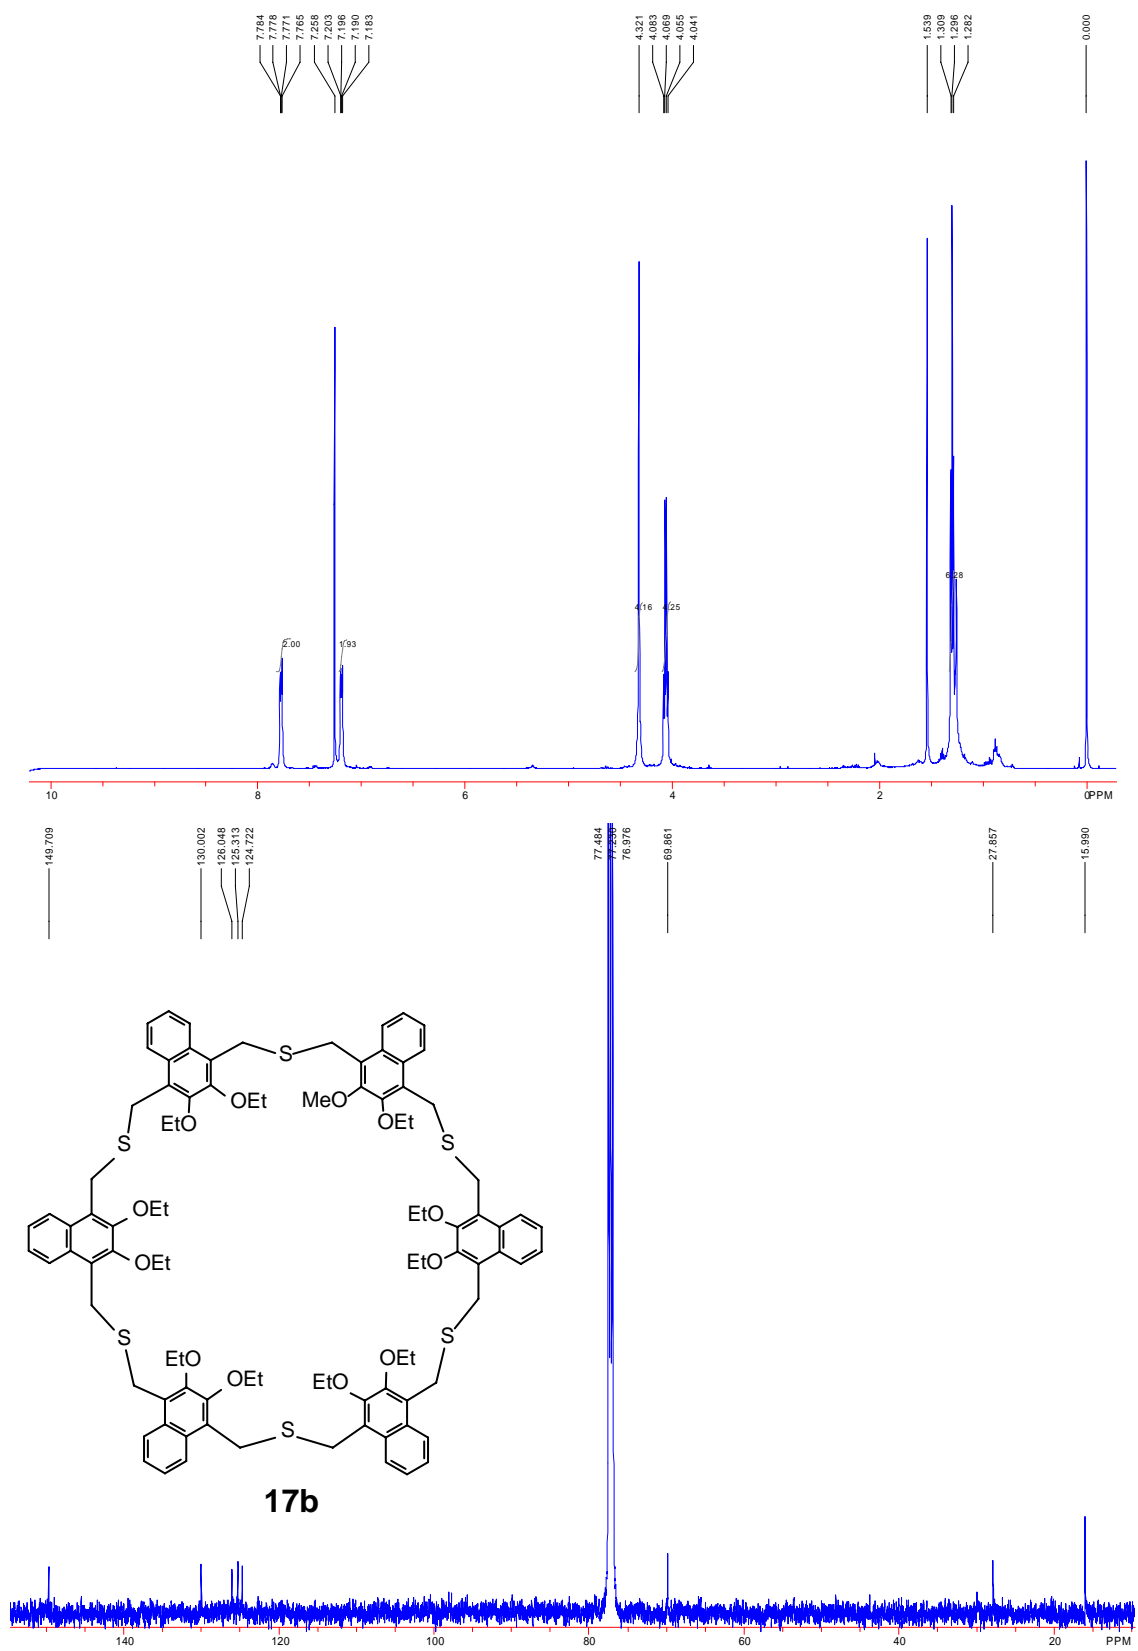



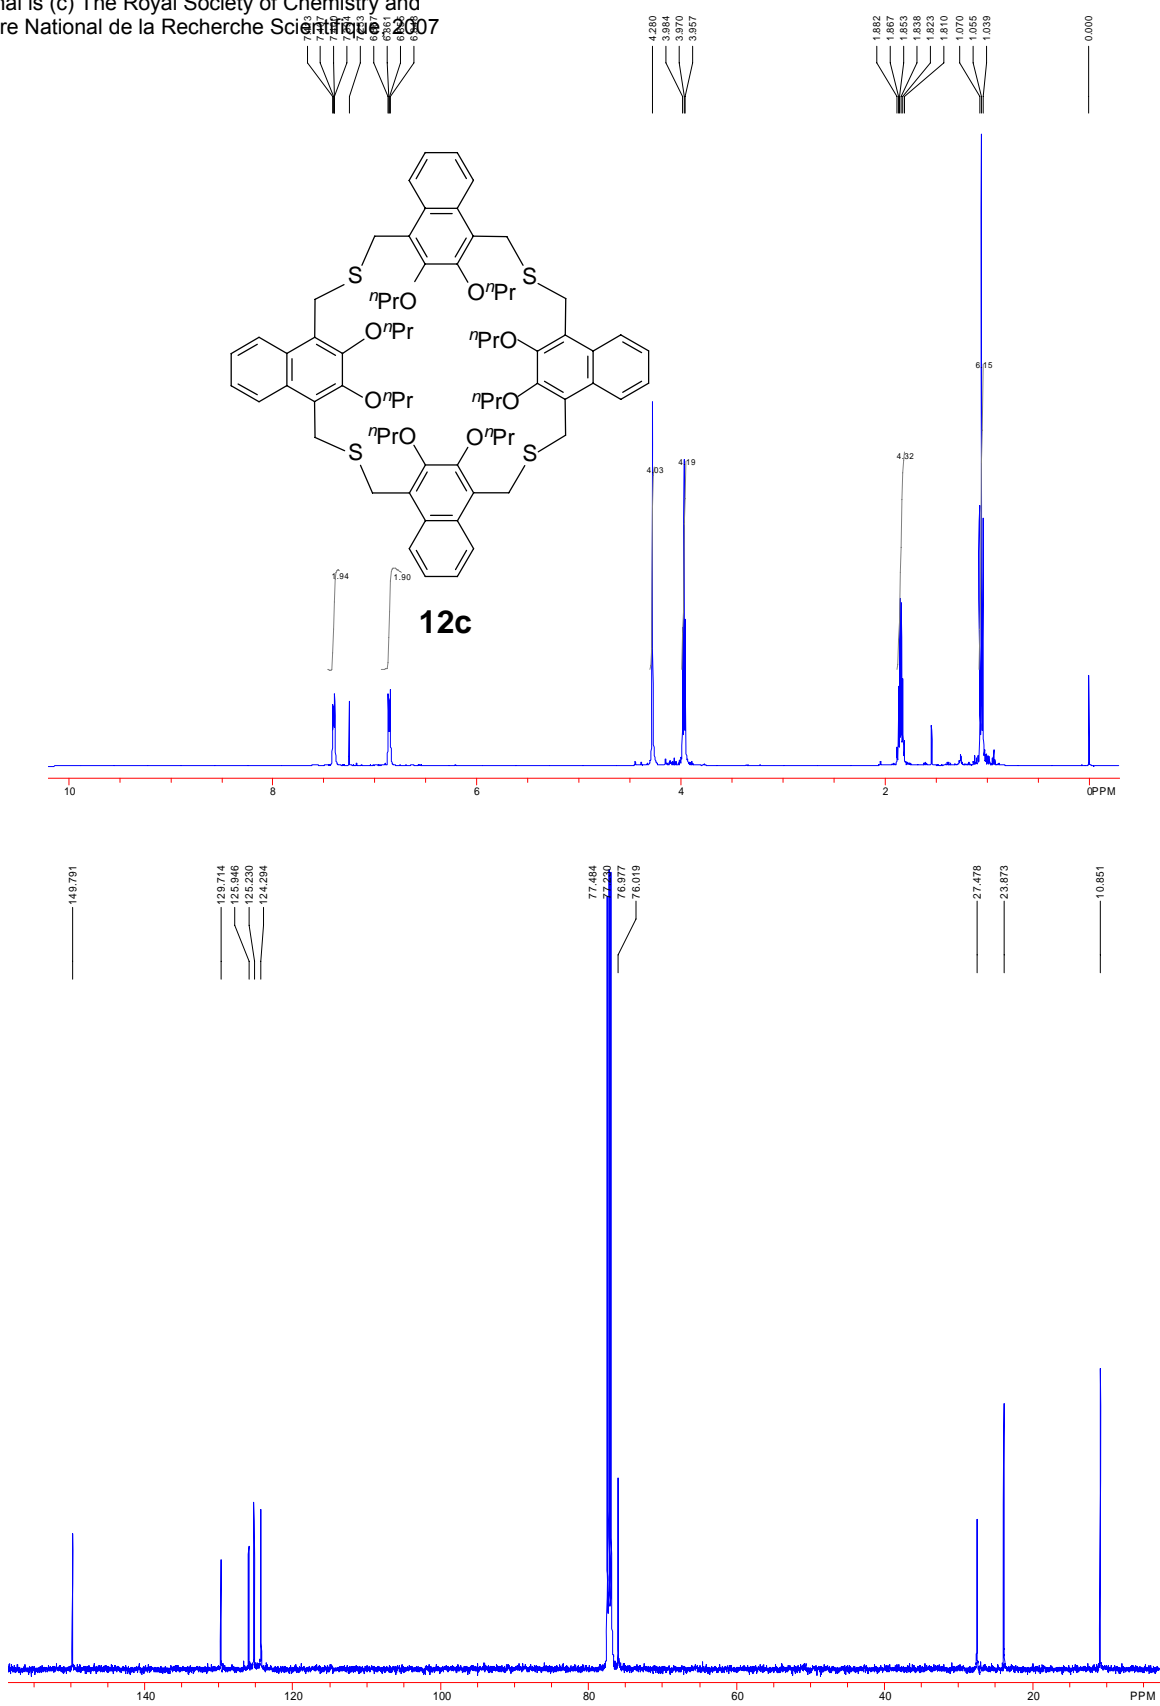

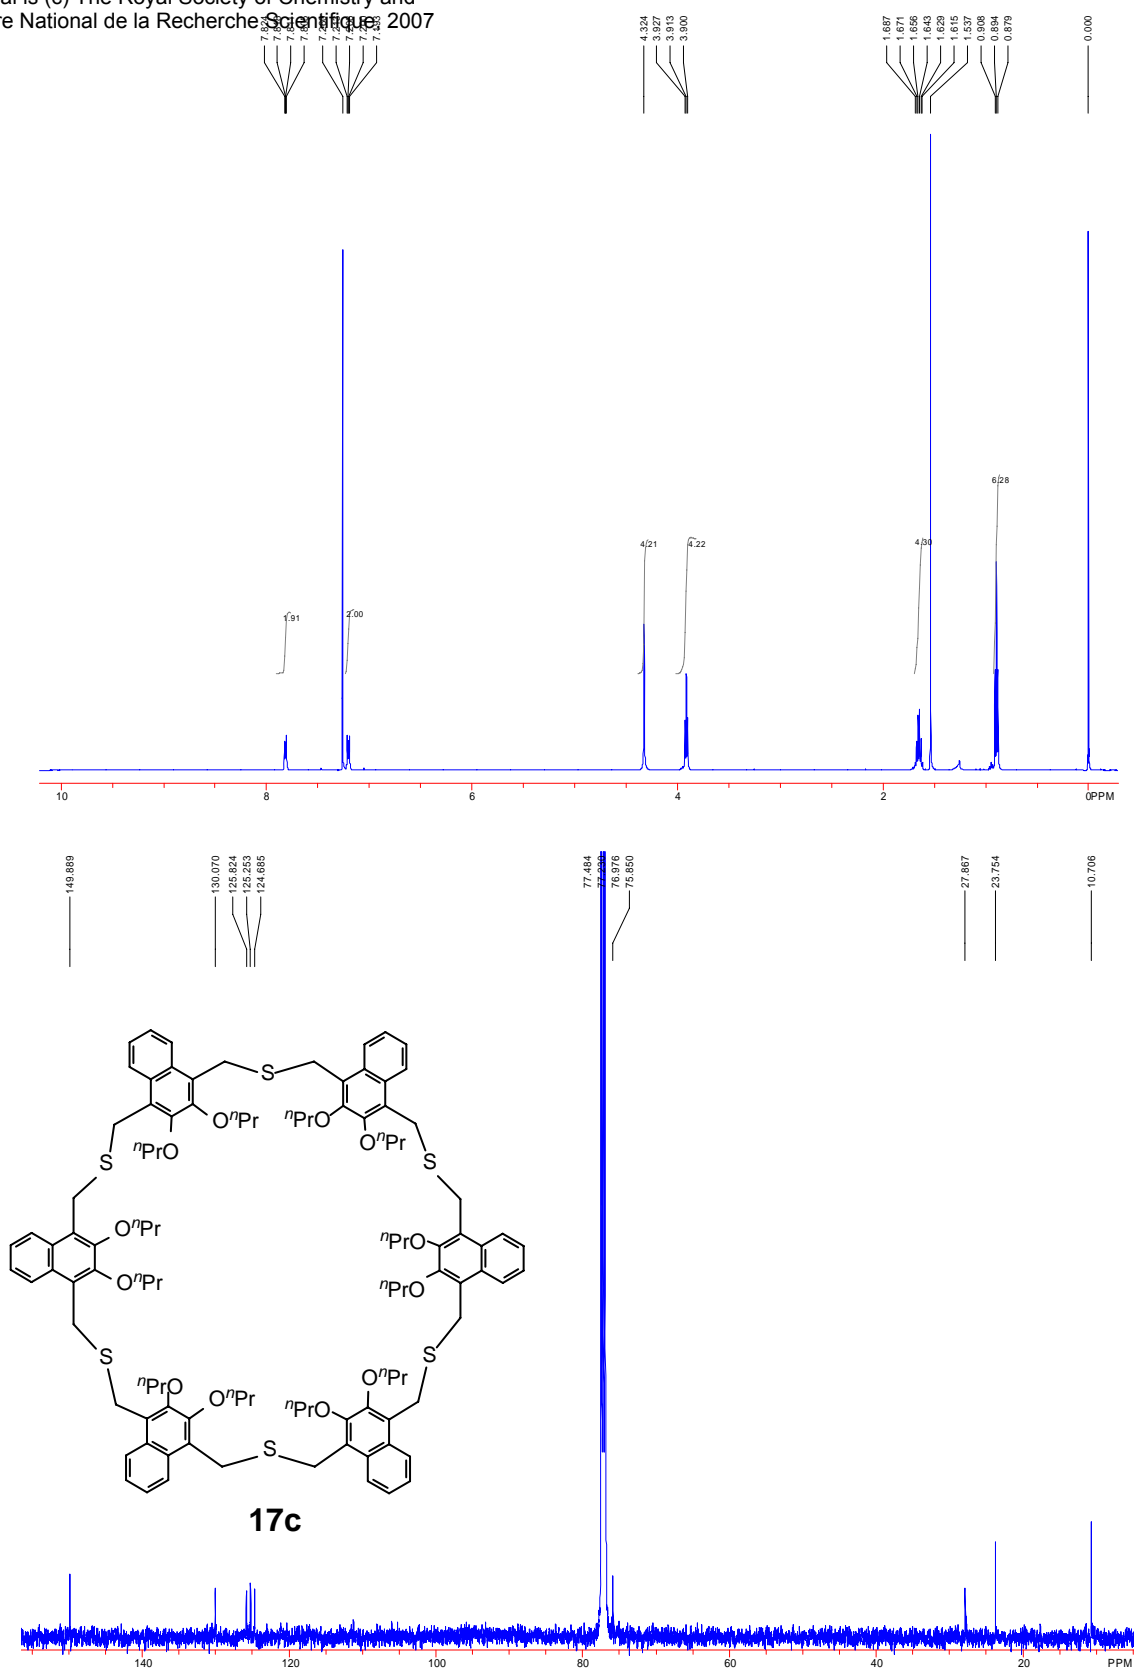

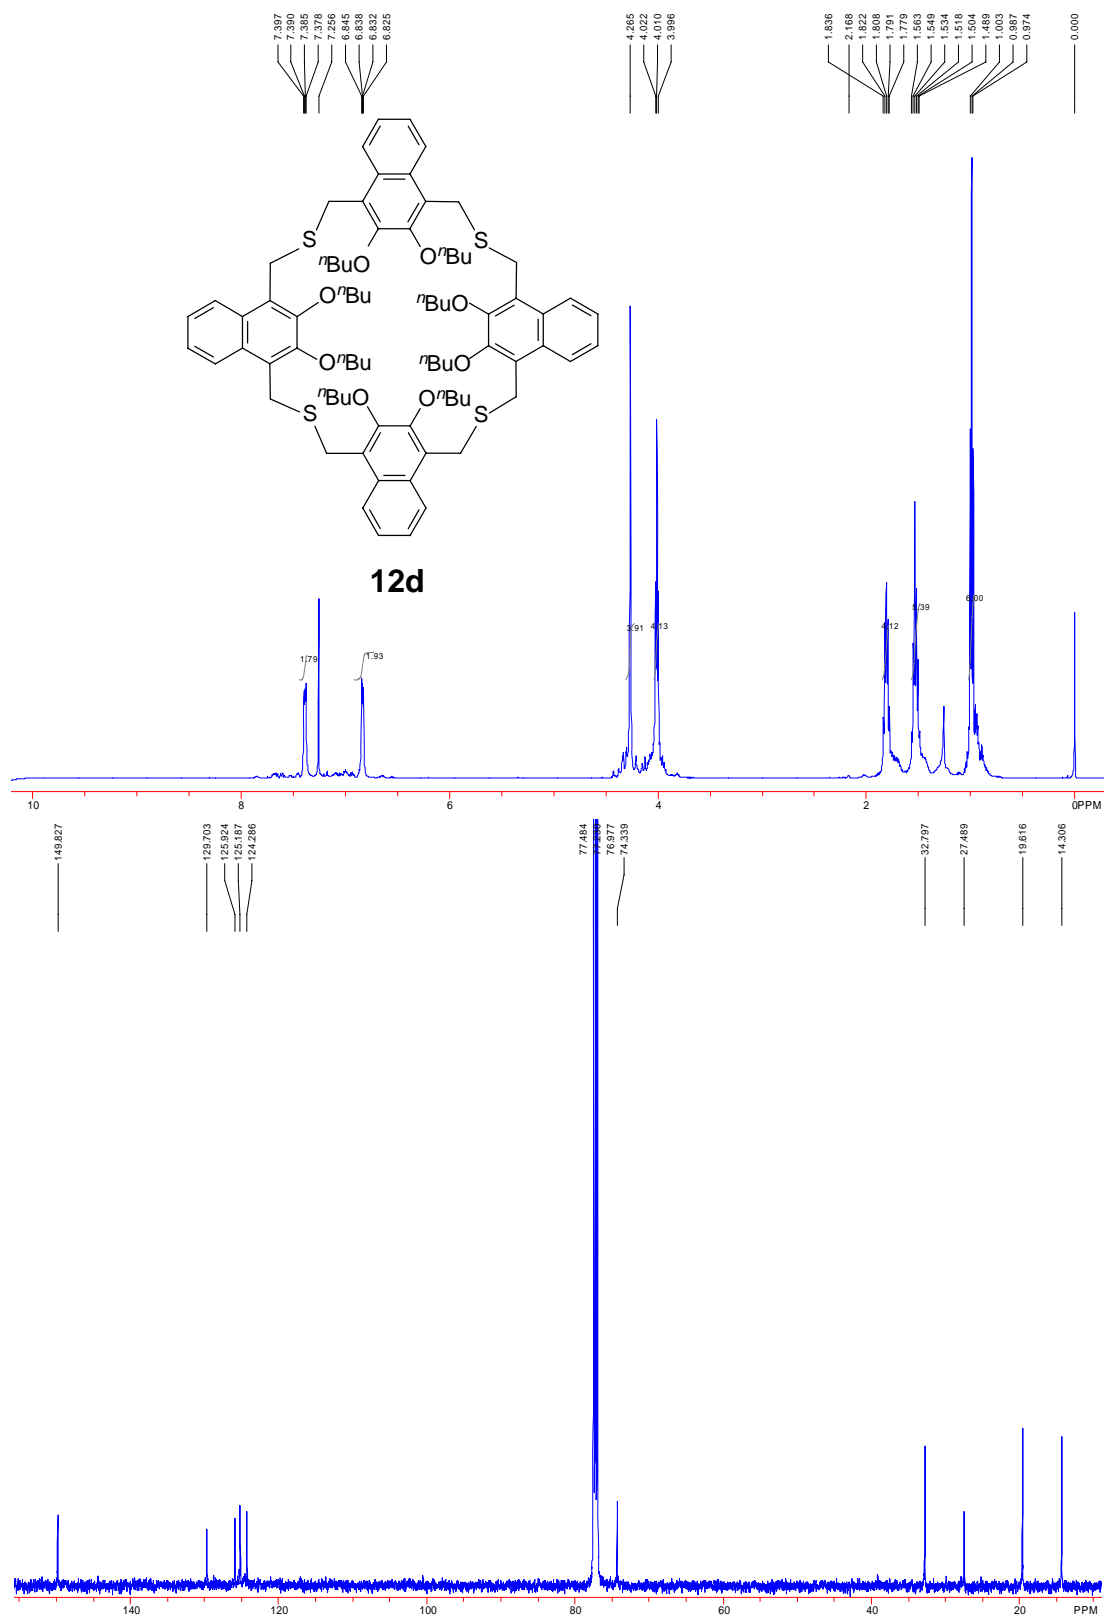

**Appendix 1** Chemical shift changes ( $\Delta\delta$ ) for protons on **12a** in 1:9 CD<sub>3</sub>CN-CDCl<sub>3</sub> at 298 K *versus* added AgO<sub>2</sub>CCF<sub>3</sub> solution ( $5.22 \times 10^{-3}$  M) ( $\Delta\delta$  are absolute values).

**Run #1:**

| Entry | [Ag <sup>+</sup> ]    | [12a]                 | [Ag <sup>+</sup> ]/[12a] | $\delta_{Ar}$<br>(ppm) | $\Delta\delta_{Ar}$<br>(ppm) | $\delta_{SCH_2}$<br>(ppm) | $\Delta\delta_{SCH_2}$<br>(ppm) | $\delta_{OCH_3}$<br>(ppm) | $\Delta\delta_{OCH_3}$<br>(ppm) |
|-------|-----------------------|-----------------------|--------------------------|------------------------|------------------------------|---------------------------|---------------------------------|---------------------------|---------------------------------|
| 1     | 0.00                  | $4.84 \times 10^{-4}$ | 0.00                     | <b>7.115</b>           | 0.000                        | <b>4.301</b>              | 0.000                           | 3.666                     | 0.000                           |
| 2     | $2.48 \times 10^{-4}$ | $4.61 \times 10^{-4}$ | 0.54                     | 7.121                  | 0.005                        | 4.339                     | 0.038                           | 3.699                     | 0.033                           |
| 3     | $3.26 \times 10^{-4}$ | $4.54 \times 10^{-4}$ | 0.72                     | 7.120                  | 0.005                        | 4.351                     | 0.050                           | 3.707                     | 0.041                           |
| 4     | $4.01 \times 10^{-4}$ | $4.47 \times 10^{-4}$ | 0.90                     | 7.124                  | 0.008                        | 4.361                     | 0.060                           | 3.713                     | 0.047                           |
| 5     | $4.74 \times 10^{-4}$ | $4.40 \times 10^{-4}$ | 1.08                     | 7.124                  | 0.009                        | 4.370                     | 0.069                           | 3.717                     | 0.051                           |
| 6     | $6.47 \times 10^{-4}$ | $4.24 \times 10^{-4}$ | 1.53                     | 7.124                  | 0.009                        | 4.390                     | 0.089                           | 3.728                     | 0.062                           |
| 7     | $8.08 \times 10^{-4}$ | $4.09 \times 10^{-4}$ | 1.97                     | 7.126                  | 0.010                        | 4.406                     | 0.105                           | 3.738                     | 0.072                           |
| 8     | $9.58 \times 10^{-4}$ | $3.95 \times 10^{-4}$ | 2.42                     | not clear              | -                            | 4.418                     | 0.117                           | 3.745                     | 0.079                           |
| 9     | $1.10 \times 10^{-3}$ | $3.82 \times 10^{-4}$ | 2.87                     | not clear              | -                            | 4.428                     | 0.127                           | 3.751                     | 0.085                           |

**Run #2:**

| Entry | [Ag <sup>+</sup> ]    | [12a]                 | [Ag <sup>+</sup> ]/[12a] | $\delta_{Ar}$<br>(ppm) | $\Delta\delta_{Ar}$<br>(ppm) | $\delta_{SCH_2}$<br>(ppm) | $\Delta\delta_{SCH_2}$<br>(ppm) | $\delta_{OCH_3}$<br>(ppm) | $\Delta\delta_{OCH_3}$<br>(ppm) |
|-------|-----------------------|-----------------------|--------------------------|------------------------|------------------------------|---------------------------|---------------------------------|---------------------------|---------------------------------|
| 1     | 0.00                  | $4.84 \times 10^{-4}$ | 0.00                     | 7.116                  | 0.000                        | 4.301                     | 0.000                           | 3.666                     | 0.000                           |
| 2     | $2.48 \times 10^{-4}$ | $4.61 \times 10^{-4}$ | 0.54                     | 7.121                  | 0.005                        | 4.339                     | 0.038                           | 3.700                     | 0.034                           |
| 3     | $3.26 \times 10^{-4}$ | $4.54 \times 10^{-4}$ | 0.72                     | 7.124                  | 0.008                        | 4.350                     | 0.049                           | 3.708                     | 0.042                           |
| 4     | $4.01 \times 10^{-4}$ | $4.47 \times 10^{-4}$ | 0.90                     | 7.126                  | 0.010                        | 4.360                     | 0.059                           | 3.716                     | 0.050                           |
| 5     | $4.74 \times 10^{-4}$ | $4.40 \times 10^{-4}$ | 1.08                     | 7.126                  | 0.010                        | 4.369                     | 0.068                           | 3.722                     | 0.056                           |
| 6     | $6.47 \times 10^{-4}$ | $4.24 \times 10^{-4}$ | 1.53                     | 7.128                  | 0.012                        | 4.390                     | 0.089                           | 3.735                     | 0.069                           |
| 7     | $8.08 \times 10^{-4}$ | $4.09 \times 10^{-4}$ | 1.97                     | not clear              | -                            | 4.404                     | 0.103                           | 3.744                     | 0.078                           |
| 8     | $9.58 \times 10^{-4}$ | $3.95 \times 10^{-4}$ | 2.42                     | not clear              | -                            | 4.416                     | 0.115                           | 3.752                     | 0.086                           |
| 9     | $1.10 \times 10^{-3}$ | $3.82 \times 10^{-4}$ | 2.87                     | not clear              | -                            | 4.426                     | 0.125                           | 3.758                     | 0.092                           |

**Appendix 2** Chemical shift changes ( $\Delta\delta$ ) for protons on **12b** in 1:9 CD<sub>3</sub>CN-CDCl<sub>3</sub> at 298 K *versus* added AgO<sub>2</sub>CCF<sub>3</sub> solution ( $5.07 \times 10^{-3}$  M) ( $\Delta\delta$  are absolute values).

**Run #1:**

| Entry | [Ag <sup>+</sup> ]    | [12b]                 | [Ag <sup>+</sup> ]/[12b] | [12b]/[Ag <sup>+</sup> ] | $\delta_{Ar}$<br>(ppm) | $\Delta\delta_{Ar}$<br>(ppm) | $\delta_{SCH_2}$<br>(ppm) | $\Delta\delta_{SCH_2}$<br>(ppm) | $\delta_{OCH_2}$<br>(ppm) | $\Delta\delta_{OCH_2}$<br>(ppm) |
|-------|-----------------------|-----------------------|--------------------------|--------------------------|------------------------|------------------------------|---------------------------|---------------------------------|---------------------------|---------------------------------|
| 1     | 0.00                  | $4.84 \times 10^{-4}$ | 0.00                     | 0.00                     | <b>6.930</b>           | 0.000                        | <b>4.304</b>              | 0                               | <b>4.069</b>              | 0.000                           |
| 2     | $2.41 \times 10^{-4}$ | $4.61 \times 10^{-4}$ | 0.52                     | 1.91                     | 6.964                  | 0.034                        | 4.353                     | 0.049                           | 4.083                     | 0.014                           |
| 3     | $3.17 \times 10^{-4}$ | $4.54 \times 10^{-4}$ | 0.70                     | 1.43                     | 6.977                  | 0.047                        | 4.369                     | 0.065                           | 4.088                     | 0.018                           |
| 4     | $3.90 \times 10^{-4}$ | $4.47 \times 10^{-4}$ | 0.87                     | 1.15                     | 6.982                  | 0.052                        | 4.380                     | 0.076                           | 4.089                     | 0.019                           |
| 5     | $4.61 \times 10^{-4}$ | $4.40 \times 10^{-4}$ | 1.05                     | 0.96                     | 6.988                  | 0.058                        | 4.392                     | 0.088                           | 4.092                     | 0.023                           |
| 6     | $6.29 \times 10^{-4}$ | $4.24 \times 10^{-4}$ | 1.48                     | 0.67                     | 7.002                  | 0.072                        | 4.414                     | 0.110                           | 4.095                     | 0.026                           |
| 7     | $7.85 \times 10^{-4}$ | $4.09 \times 10^{-4}$ | 1.92                     | 0.52                     | 7.017                  | 0.087                        | 4.432                     | 0.128                           | 4.099                     | 0.029                           |
| 8     | $9.31 \times 10^{-4}$ | $3.95 \times 10^{-4}$ | 2.35                     | 0.42                     | 7.021                  | 0.091                        | 4.446                     | 0.142                           | 4.102                     | 0.032                           |
| 9     | $1.07 \times 10^{-3}$ | $3.82 \times 10^{-4}$ | 2.79                     | 0.36                     | 7.029                  | <b>0.099</b>                 | 4.457                     | <b>0.153</b>                    | 4.103                     | <b>0.034</b>                    |

**Run #2:**

| Entry | [Ag <sup>+</sup> ]     | [12b]                 | [Ag <sup>+</sup> ]/[12b] | [12b]/[Ag <sup>+</sup> ] | $\delta_{Ar}$<br>(ppm) | $\Delta\delta_{Ar}$<br>(ppm) | $\delta_{SCH_2}$<br>(ppm) | $\Delta\delta_{SCH_2}$<br>(ppm) | $\delta_{OCH_2}$<br>(ppm) | $\Delta\delta_{OCH_2}$<br>(ppm) |
|-------|------------------------|-----------------------|--------------------------|--------------------------|------------------------|------------------------------|---------------------------|---------------------------------|---------------------------|---------------------------------|
| 1     | 0.00                   | $4.84 \times 10^{-4}$ | 0.00                     | 0.00                     | <b>6.931</b>           | 0.000                        | <b>4.306</b>              | 0.000                           | <b>4.069</b>              | 0.000                           |
| 2     | $2.41 \times 10^{-4}$  | $4.61 \times 10^{-4}$ | 0.52                     | 1.91                     | 6.963                  | 0.032                        | 4.355                     | 0.049                           | 4.084                     | 0.015                           |
| 3     | $3.17 \times 10^{-4}$  | $4.54 \times 10^{-4}$ | 0.70                     | 1.43                     | 6.976                  | 0.045                        | 4.369                     | 0.063                           | 4.088                     | 0.019                           |
| 4     | $3.90 \times 10^{-4}$  | $4.47 \times 10^{-4}$ | 0.87                     | 1.15                     | 6.985                  | 0.054                        | 4.382                     | 0.076                           | 4.092                     | 0.023                           |
| 5     | $4.61 \times 10^{-4}$  | $4.40 \times 10^{-4}$ | 1.05                     | 0.96                     | 6.990                  | 0.059                        | 4.393                     | 0.087                           | 4.092                     | 0.023                           |
| 6     | $6.286 \times 10^{-4}$ | $4.24 \times 10^{-4}$ | 1.48                     | 0.67                     | 7.003                  | 0.072                        | 4.416                     | 0.110                           | 4.097                     | 0.027                           |
| 7     | $7.85 \times 10^{-4}$  | $4.09 \times 10^{-4}$ | 1.92                     | 0.52                     | 7.015                  | 0.084                        | 4.433                     | 0.127                           | 4.102                     | 0.033                           |
| 8     | $9.31 \times 10^{-4}$  | $3.95 \times 10^{-4}$ | 2.35                     | 0.42                     | 7.026                  | 0.095                        | 4.446                     | 0.140                           | 4.105                     | 0.036                           |
| 9     | $1.07 \times 10^{-3}$  | $3.82 \times 10^{-4}$ | 2.79                     | 0.36                     | 7.031                  | <b>0.100</b>                 | 4.456                     | <b>0.150</b>                    | 4.108                     | <b>0.039</b>                    |

**Appendix 3** Chemical shift changes ( $\Delta\delta$ ) for the  $-\text{CH}_2\text{S}-\text{CH}_2-$  protons on **12a** in 1:9  $\text{CD}_3\text{CN}-\text{CDCl}_3$  at 298 K *versus* added  $\text{HgCl}_2$  solution ( $5.07 \times 10^{-3}$  M) ( $\Delta\delta$  are absolute values).

Run #1:

| Entry # | [Hg <sup>2+</sup> ]<br>(mol/L) | [Hg <sup>2+</sup> ]<br>[OMe] | $\delta$ (ppm) | $\Delta\delta$ (ppm) |
|---------|--------------------------------|------------------------------|----------------|----------------------|
| 1       | 0.000E+00                      | 0.0                          | 4.301          | 0.000                |
| 2       | 1.644E-04                      | 0.35                         | 4.303          | 0.002                |
| 3       | 3.919E-04                      | 0.87                         | 4.305          | 0.004                |
| 4       | 5.661E-04                      | 1.31                         | 4.306          | 0.005                |
| 5       | 8.785E-04                      | 2.18                         | 4.309          | 0.008                |
| 6       | 1.390E-03                      | 3.92                         | 4.313          | 0.012                |
| 7       | 1.790E-03                      | 5.67                         | 4.316          | 0.015                |
| 8       | 2.113E-03                      | 7.41                         | 4.318          | 0.017                |
| 9       | 2.378E-03                      | 9.16                         | 4.321          | 0.020                |
| 10      | 2.600E-03                      | 10.90                        | 4.322          | 0.021                |

Run #2:

| Entry # | [Hg <sup>2+</sup> ]<br>(mol/L) | [Hg <sup>2+</sup> ]<br>[OMe] | $\delta$ (ppm) | $\Delta\delta$ (ppm) |
|---------|--------------------------------|------------------------------|----------------|----------------------|
| 1       | 0.000E+00                      | 0.0                          | 4.301          | 0.000                |
| 2       | 1.644E-04                      | 0.35                         | 4.303          | 0.002                |
| 3       | 3.919E-04                      | 0.87                         | 4.305          | 0.004                |
| 4       | 5.661E-04                      | 1.31                         | 4.306          | 0.005                |
| 5       | 8.785E-04                      | 2.18                         | 4.309          | 0.008                |
| 6       | 1.390E-03                      | 3.92                         | 4.313          | 0.012                |
| 7       | 1.790E-03                      | 5.67                         | 4.315          | 0.014                |
| 8       | 2.113E-03                      | 7.41                         | 4.318          | 0.017                |
| 9       | 2.378E-03                      | 9.16                         | 4.320          | 0.019                |
| 10      | 2.600E-03                      | 10.90                        | 4.322          | 0.021                |

**Appendix 4** Chemical shift changes ( $\Delta\delta$ ) for the  $-\text{CH}_2\text{S}-\text{CH}_2-$  protons on **12b** in 1:9  $\text{CD}_3\text{CN}-\text{CDCl}_3$  at 298 K *versus* added  $\text{HgCl}_2$  solution ( $5.07 \times 10^{-3}$  M) ( $\Delta\delta$  are absolute values).

Run #1:

| Entry # | [Hg <sup>2+</sup> ]<br>(mol/L) | [OEt]<br>(mol/L) | [Hg <sup>2+</sup> ]<br>[OEt] | $\Delta\delta$<br>(ppm) |
|---------|--------------------------------|------------------|------------------------------|-------------------------|
| 1       | 0.000E+00                      | 4.838E-04        | 0.0                          | 0.000                   |
| 2       | 1.644E-04                      | 4.682E-04        | 0.37                         | 0.004                   |
| 3       | 3.919E-04                      | 4.466E-04        | 0.87                         | 0.007                   |
| 4       | 5.661E-04                      | 4.301E-04        | 1.31                         | 0.009                   |
| 5       | 8.785E-04                      | 4.004E-04        | 2.18                         | 0.014                   |
| 6       | 1.390E-03                      | 3.519E-04        | 3.92                         | 0.020                   |
| 7       | 1.790E-03                      | 3.138E-04        | 5.67                         | 0.024                   |
| 8       | 2.378E-03                      | 2.580E-04        | 9.16                         | 0.030                   |
| 9       | 2.600E-03                      | 2.370E-04        | 10.9                         | 0.034                   |

Run #2:

| Entry # | [Hg <sup>2+</sup> ]<br>(mol/L) | [OEt]<br>(mol/L) | [Hg <sup>2+</sup> ]<br>[OEt] | $\Delta\delta$<br>(ppm) |
|---------|--------------------------------|------------------|------------------------------|-------------------------|
| 1       | 0.000E+00                      | 4.838E-04        | 0.0                          | 0.000                   |
| 2       | 1.644E-04                      | 4.682E-04        | 0.37                         | 0.003                   |
| 3       | 3.919E-04                      | 4.466E-04        | 0.87                         | 0.007                   |
| 4       | 4.632E-04                      | 4.398E-04        | 1.05                         | 0.008                   |
| 5       | 5.661E-04                      | 4.301E-04        | 1.31                         | 0.010                   |
| 6       | 8.785E-04                      | 4.004E-04        | 2.18                         | 0.014                   |
| 7       | 1.390E-03                      | 3.519E-04        | 3.92                         | 0.020                   |
| 8       | 1.790E-03                      | 3.138E-04        | 5.67                         | 0.024                   |
| 9       | 2.378E-03                      | 2.580E-04        | 9.16                         | 0.031                   |
| 10      | 2.600E-03                      | 2.370E-04        | 10.9                         | 0.033                   |

**Appendix 5.** Determinations of  $K_{\text{assoc}}$  for **12a**: $\text{Ag}^+$  (*top*) and for **12b**: $\text{Ag}^+$  (*bottom*) complexes in 1:9  $\text{CD}_3\text{CN-CDCl}_3$  at 298 K.  $\text{AgO}_2\text{CCF}_3$  ( $5.22 \times 10^{-3}$  M) solution was added as aliquots.

*Left: Run 1; Right Run 2.*

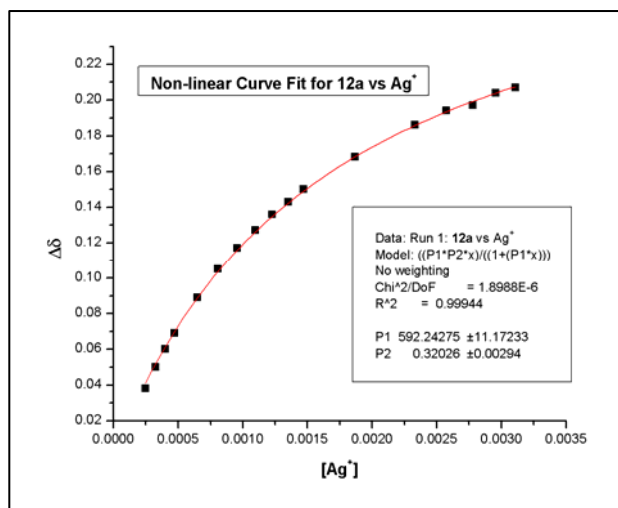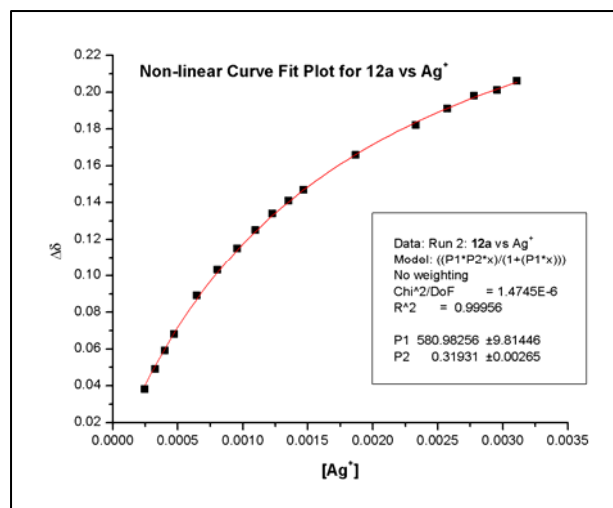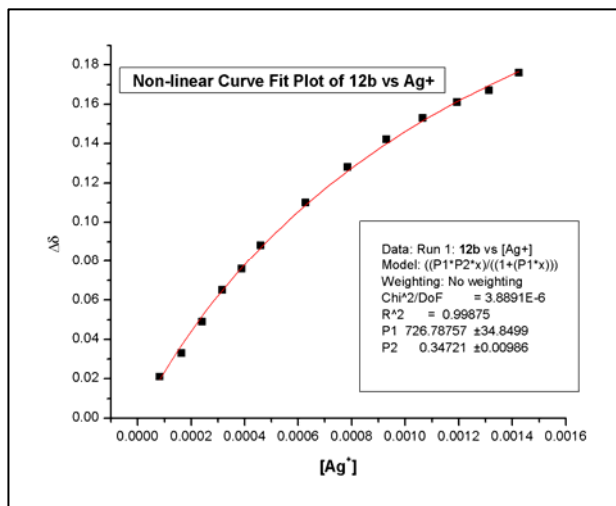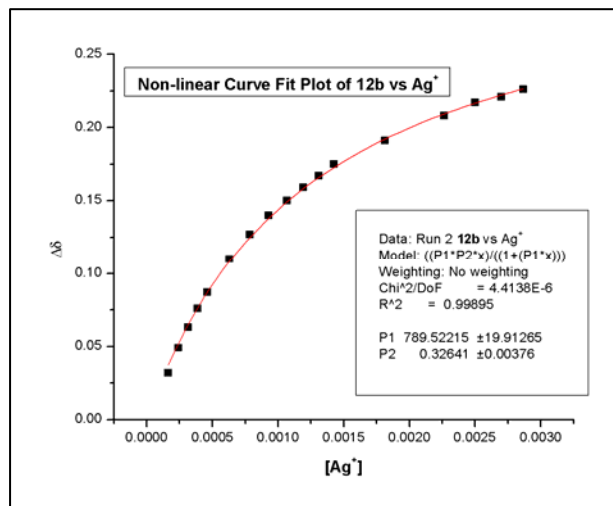

**Appendix 6.** Determination of  $K_{\text{assoc}}$  for **12a**: $\text{Hg}^{2+}$  (*top*) and for **12b**: $\text{Hg}^{2+}$  (*bottom*) complexes complexes in 1:9  $\text{CD}_3\text{CN}$ - $\text{CDCl}_3$  at 298 K.  $\text{HgCl}_2$  solutions ( $5.10 \times 10^{-3}$  M) solution was added as aliquots.

*Left: Run 1; Right Run 2.*

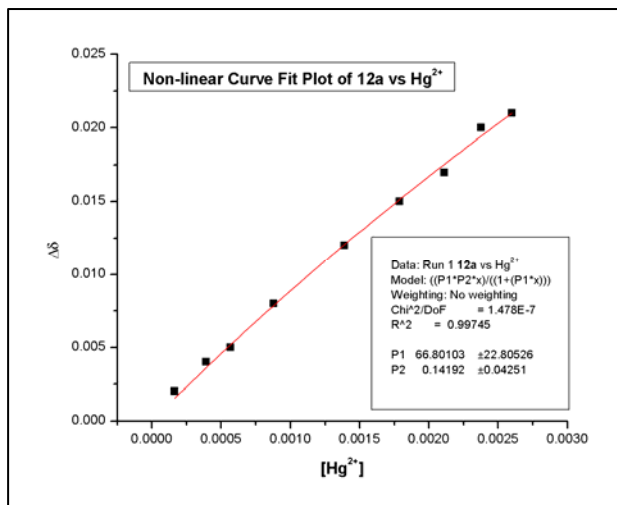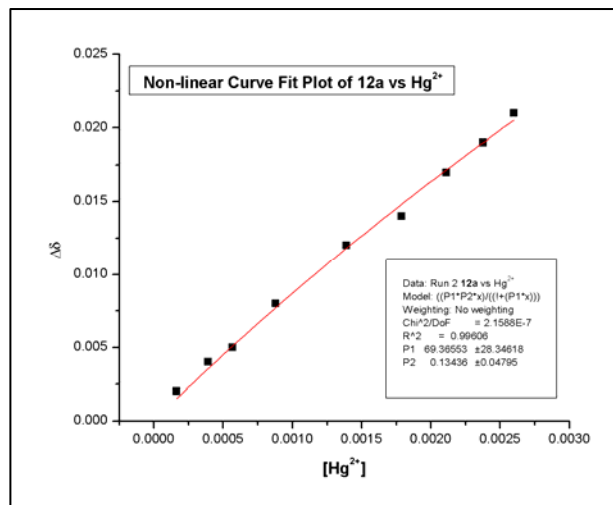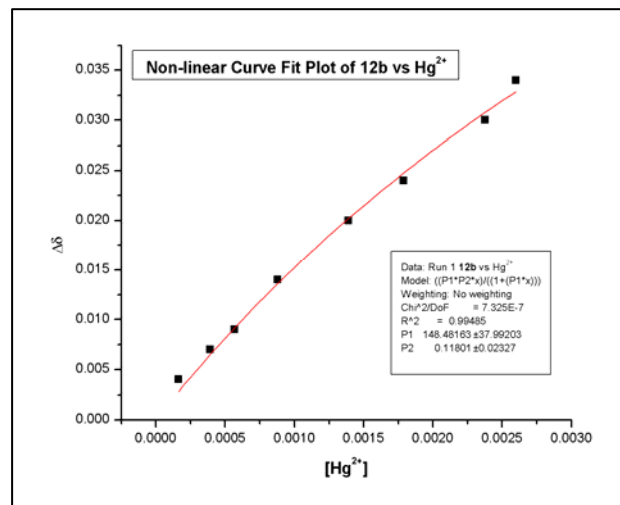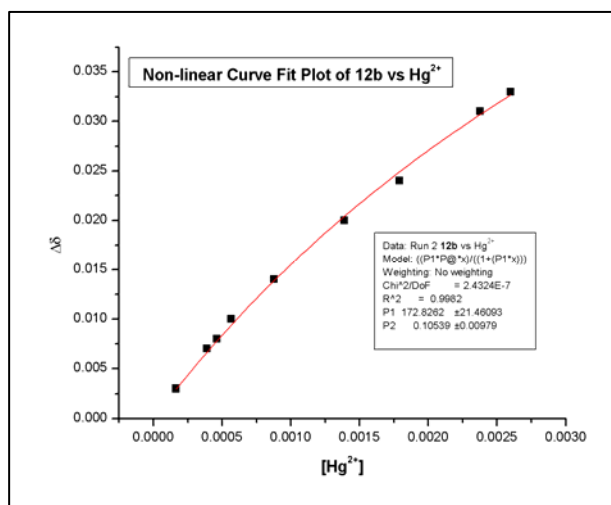

Supplement: b702152f.pdf [file b702152f.pdf]
